# Supplementary material
Source: PubMed Central journal article supplement (PMC10226912)
Supplement: 701_2023_5592_MOESM1_ESM.pdf [file 701_2023_5592_MOESM1_ESM.pdf]

**Table S1 – Definition of postoperative ICU events**

| <b>Postoperative ICU events</b>   |                                                                          |
|-----------------------------------|--------------------------------------------------------------------------|
| Reintubation                      | Reintubation for any reason other than revision surgery                  |
| Return to OR                      | Any surgery due to complications within 24 hours                         |
| Mechanical ventilation            | Any postoperative ventilation > 4 hours                                  |
| Vasopressors                      | Application of over 0,4 mg norepinephrine per hour to hold MAP > 60 mmHg |
| Impaired consciousness            | GCS <= 13                                                                |
| Intracranial hypertension         | Mannitol therapy or CSF drainage                                         |
| Seizure                           | Generalized seizure or recurring focal seizure                           |
| Hemiparesis                       | Grade <= 3/5                                                             |
| Swallowing Disorder               | Impaired swallowing requiring a gastral tube or parenteral nutrition     |
| CPR                               |                                                                          |
| Death in the perioperative period |                                                                          |

**Routine ICU Admission After Brain Tumor Surgery:  
Retrospective Validation and Critical Appraisal of Two Prediction Scores**

Jan-Oliver Neumann<sup>1§</sup>, Stephanie Schmidt<sup>1§</sup>, Amin Nohman<sup>1</sup>,  
Martin Jakobs<sup>1</sup> and Andreas Unterberg<sup>1</sup>

<sup>1</sup>Department of Neurosurgery, University Hospital Heidelberg, Germany

§Both authors contributed equally

**Corresponding author:** PD Dr. Jan-Oliver Neumann  
Department of Neurosurgery  
University Hospital Heidelberg  
Im Neuenheimer Feld 400  
D-69120 Heidelberg  
+49-6221-56-38096  
[Jan-Oliver.Neumann@med.uni-heidelberg.de](mailto:Jan-Oliver.Neumann@med.uni-heidelberg.de)
